# Supplementary material for: Diversity and Expression of MicroRNAs in the Filarial Parasite, Brugia malayi
Source: PLoS One. 2014 May 13;9(5):e96498. doi: 10.1371/journal.pone.0096498 (PMC4019659; doi:10.1371/journal.pone.0096498)
Supplement: Table S3 — Prevalent B. malayi miRNAs. This table lists the sequence, accession number, position, strand, hairpin stability and method(s) of identification/validation for the prevalent B. malayi miRNAs: those represented by 100 or more reads in one of the small RNA libraries (Table S1). Rare miRNAs are listed in Table S4. When two miRNAs are generated from the same RNA hairpin, a star (*) after the name denotes the less abundant miRNA. (XLSX) [file pone.0096498.s004.xlsx]

## Sheet: Sheet1
miRNA	Sequence	Acc. no. or TIb	Positionc	Strand	Δ G	Genomic contextd	Identificatione
bantam	UGAGAUCAUUGUGAAAGCUAUU	DS237873	148736-148826	-	-37.5	intergenic	B,PC,Cs
bantam-b	UGAGAUCAUGCCACAUCCGUCU	Absent					Cs
let-7	UGAGGUAGUAGGUUGUAUAGUU	DS238124	25271-25394	-	-36.6	intergenic	B,N,Cs
lin-4	UCCCUGAGACCUCUGCUGCGA	DS239215	197979-198068	-	-38.8	intergenic	B,Cs
miR-1	UGGAAUGUAAAGAAGUAUGUA	Absent					Cs
miR-100a	AACCCGUAGUUUCGAACAUGUGU	DS238870	84696-84786	-	-30	intronic	PC,Cs
miR-100b	AACCCGUAGAUCCGAACUUGUGUU	DS238124	25479-25569	-	-36.6	intergenic	B,Cs
miR-100c	AACCCGUAGAACUGAAAUCGUGU	DS239383	110900-110975	-	-35.1	intronic	B,Cs
miR-100d	UACCCGUAGCUCCGAAUAUGUGU	DS238870	85606-85711	-	-37.6	exonic	PC, Cs
miR-1175	UGAGAUUCUUAUUCCUCCACUU	DS239205	32445-32554	-	-37.44	intergenic	Cs
miR-124	UAAGGCACGCGGUGAAUGCCA	TI|1174796747	271-366
		TI|11747094970	911-1001				B,Cs
miR-133	AUUGGUCCCCUUCAACCAGCU	DS239429	2739013-2739142	+	-32.1	intergenic	B,Cs
miR-153	UUGCAUAGUCACAAAAGUGAUGG	TI|1172814984	91-180
		TI|1173557506	532-621
		DS260136	469-530	-	-33.2	NA	PC,Cs,P,qPCR
miR-1822	GAGCUGCCCCUUGAAAGACU	DS237449	2283-2382	+	-35.9	NA	Cs
miR-228	AAUGGCACUAGAUGAAUUCACGG	DS239411	62361-62448	+	-29.7	intergenic	B,Cs
miR-234-1	UUAUUGCUUGAGAAUACAAAU	DS239416	1007521-1007621	+	-35.2	intergenic	B,Cs
miR-234-2	UUAUUGCUUGAGAAUACAAAU	DS237307	2960-3060	+	-35.2	NA	Cs
miR-236-1	UAAUACUGUCAGGUAAUGACGAU	DS257052	106-182	-	-33.6	NA	B,Cs
miR-239	UUUGUACUUCGGCUAAGGUGCUG	DS239411	6353989-6354082	+	-38.8	intergenic	Cs
miR-239*f	ACACCUUGGCUAGGUACAAUGCU	DS239411	6353989-6354082	+	-38.8	intergenic	Cs
miR-252	CUAAGUAGUAGUGCCGCAGG	DS239411	5663858-5663768	-	-32.5	intergenic	Cs
miR-279	UGACUAGAACCAUACUCAGCU	DS237916	19511-19602	+	-36.5	intergenic	Cs
miR-281	UGUCAUGGAAUUGCUCUCUUU	DS238467	1179-1270	+	-34.6	NA	B,Cs
miR-281*f	AAGAGAGCCAUCUGUUGACAGU	DS238467	1179-1270	+	-34.6	NA	B,Cs
miR-283	AAUAUCAGCAGGUUUUGUCUGG	DS238670	5643-5735	-	-44.5	intergenic	Cs
miR-2a	UAUCACAGCCAGCUUUGAUGU	DS237074	2477-2568	-	-31.4	NA	B,PC,Cs
miR-2b-1	CAUCACAGACCCGAUGCAGCGAC	DS237458	1770-1862	+	-34.2	NA	PC,N,Cs
miR-2b-2	CAUCACAGACCCGAUGCAGCGAC	DS239143	2496-2588	+	-30.8	NA	PC,N,Cs
miR-2b-2*f	AGUUGUAUCGUCUGUGAUAU	DS239143	2496-2588	+	-30.8	NA	Cs
miR-2c	AUCACAGCACGAUUCGGCUCG	DS237916	21520-21610	+	-32.6	intergenic	PC,N,Cs
miR-2d	UAUCACAGAAUUGAUGCAGCGAGC	DS238497	1650-1759	-	-43.1	intergenic	Cs
miR-2e	UAUCACAGUACUAUUCCGGGCA	DS238756	30058-30167	+	-28.8	intergenic	Cs
miR-2h-1*f	AGUCGUAUCGACUCUGAUAU	DS237141	10943-11060	-	-33.5	NA	Cs,P
miR-2h-2*f	AGUCGUAUCGACUCUGAUAU	DS238508	1178-1295	+	-33.5	intergenic	Cs,P
miR-2i*f	GCUGCAUCGUCUGAGUUAUGCG	DS238497	1267-1359	-	-40.2	intergenic	Cs
miR-307	UCACAACCUCCUUGAGUAAGCGG	DS239412	177772-177889	-	-40.9	intergenic	Cs
miR-34	UGGCAGUGUGGUUAGCUGGUUGU	DS239411	5570685-5570795	-	-44.6	intergenic	B,Cs
miR-36a-1	UCACCGGGUGCACAUUCGGUC	DS260269	516-607	+	-35.4	NA	Cs
miR-36a-2	UCACCGGGUGCACAUUCGGUC	DS239474	399-490	+	-35.4	intergenic	Cs
miR-36a-3	UCACCGGGUGCACAUUCGGUC	DS236940	21209-21118	-	-35.1	intergenic	Cs
miR-36b	UCACCGGAGACAUUAUUCCGCA	DS237458	1894-1984	+	-34.5	NA	B,Cs
miR-36b*f	CGGGAUAGUCUCUCACGGUAGAGC	DS237458	1894-1984	+	-34.5	NA	Cs,P
miR-36c	UCACCGGAGACAUUGUUCCGCA	DS239143	2626-2716	+	-35.7	NA	PC,N,Cs
miR-36c*f	CGGGAUAGUCUCUCACGGUAGAGC	DS239143	2626-2716	+	-35.7	NA	Cs,P,qPCR
miR-36d	UCACCAGAGAAAUUAUUCCACA	DS238497	1512-1620	-	-24.8	intergenic	Cs
miR-36d*f	AGGAAUAGUCUCCCUGGAUAGA	DS238497	1512-1620	-	-24.8	intergenic	Cs
miR-45	CGACUAGAGGAACAUUCAGCAU	DS237936	10396-10488	+	-27.9	intergenic	Cs
miR-49	AAGCACCAUGUGAAGCUGCUCU	DS238855	89456-89584	+	-41.3	intergenic	Cs
miR-50	UGAUAUGUCUGAUAUUCUUGGGUU	DS239794	1713-1803	-	-38.3	intronic	B,Cs
miR-5360	ACGAAUCGUCGAAUCGGAUGUCU	DS236969	56292-56385	-	-33.5	intergenic	Cs
miR-5361	UGGGAUAUCUCGGAAGGUUUCG	DS239380	58136-58228	-	-29.8	intergenic	Cs
miR-5363	AUGGGCAACGUUUCAAACCGUGU	DS239431	1917036-1917129	-	-35.3	intergenic	Cs,P
miR-5364	CGAGGUAUUGUUUAUUGGCUGA	DS239414	500435-500527	+	-34.8	intergenic	Cs
miR-5365b	UGAUUAAGAGAACACAAUCGA	DS239359	262009-262112	-	-32.9	intergenic	Cs
miR-5366	UAAAUGCACUAUGUUGCUAAUU	DS237416	733-825	-	-36	intronic	Cs
miR-5366*f	UUAGCAGCACGGCGCAUUUGCG	DS237416	733-825	-	-36	intronic	Cs
miR-57	UACCCUGUGGUACCGAGCUGUGUCU	DS239506	2043-2138	+	-32.7	intergenic	B,Cs
miR-5838	UGAGUAUUUUCGGUUUCGCAUC	DS236978	731-840	-	-30.3	NA	Cs
miR-5838*f	UGCUAAACCGUAAAUGCUCCUA	DS236978	731-840	-	-30.3	NA	Cs
miR-5839	AGGAGUAAUAUUCUAACGUUGAGC	DS237141	12186-12280	+	-31.8	NA	Cs
miR-5840	ACACUGGGACUACUAUUCUCUU	DS237458	412-503	+	-32.6	NA	Cs
miR-5841	UUUGGCACCAUUCAGACCACUA	DS237916	21713-21804	+	-29.6	intergenic	Cs
miR-5842	CUAGUAGGAUGUAUCCAUCAG	DS239411	5889929-5890019	+	-42.6	intergenic	Cs
miR-5842*f	CGAUGGAUACAUCCUGCUAGUU	DS239411	5889929-5890019	+	-42.6	intergenic	Cs,P,qPCR
miR-5843	AUGAGCAACUUUGCCUUCGUUGA	DS239411	5975900-5975993	+	-33	intergenic	Cs
miR-5845	AUUUUGUAUCAGUAAACCGGAAU	DS239431	1339409-1339512	+	-29.6	intergenic	Cs
miR-5847-1	ACAACCCAACUAUUUUGCAGUC	DS238808	16847-16946	+	-35.8	intergenic	Cs
miR-5847-2	ACAACCCAACUAUUUUGCAGUC	DS238808	27520-27619	+	-35.8	intergenic	Cs
miR-5849	UGAAUGAUCUUGUUUUAACUG	DS237938	33853-33945	-	-37	intronic	Cs
miR-5861-1	UAAUAUCAUACGAAAGCUGAAG	DS263194	267-375	-	-26.1	NA	Cs
miR-5861-2	UAAUAUCAUACGAAAGCUGAAG	DS239429	535266-535373	+	-27.6	intergenic	Cs
miR-5862	UGACCUCCAUUACAAGAUAUGA	DS239412	723660-723768	+	-55.8	intergenic	Cs
miR-5866	UUACCAUGUUGAUCGAUCUCCA	DS239393	593279-593382	+	-31	intergenic	Cs
miR-5878	UUAUAUGAAUGAAGUACCGAGAG	DS239411	6169807-6169899	-	-37.1	intronic	Cs
miR-5879a	CAUAGUUGAGUCUUUCCUGCUA	DS237722	17055-17147	+	-43.8	intronic	Cs
miR-5882a-1	UGGGUAAUCAGGACAGUGCAUAU	DS239398	21516-21607	+	-39.2	intergenic	Cs
miR-5882a-2	UGGGUAAUCAGGACAGUGCAUAU	DS239181	1435-1526	+	-39.2	intergenic	Cs
miR-60-1	UAUUAUGCACAUUUUCAUGCAA	DS258326	347-454	+	-30.3	NA	Cs
miR-60-2	UAUUAUGCACAUUUUCAUGCAA	DS239420	554002-554109	-	-30.3	intergenic	Cs
miR-7	UGGAAGACUUGUGAUUUUGUUGUU	DS239429	1553908-1553998	-	-30.6	intergenic	B,Cs
miR-71	UGAAAGACAUGGGUAGUGAGA	DS238944	40647-40741	+	-41.1	intergenic	B,PC,Cs,P,qPCR
miR-72	AGGCAAGAUGUUGGCAUAGCUGA	DS239414	760056-760170	-	-43	intergenic	B,Cs
miR-750	CCAGAUCUGUCCUUCGGCUAA	DS239205	32787-32878	-	-36.9	intergenic	Cs
miR-79	AUAAAGCUAGGUUACCAAAGCU	DS239429	2204553-2204645	-	-29.4	intergenic	B,Cs
miR-84-1	UGAGGUAGUUUAUAAAGCUGCGA	DS238801	44663-44752	+	-27.5	intergenic	Cs
miR-84-2	UGAGGUAGUUUAUAAAGCUGCGA	DS239400	1842265-1842176	-	-31.6	intergenic	Cs
miR-86	UAAGUGAAUGCUUUGCCACAGUCU	DS237754	7886-7782	-	-42	intronic	Cs
miR-87a	GUGAGCAAAGUUUCAGGUGUUC	DS238776	19799-19889	+	-38.6	intergenic	B,PC,Cs
miR-87b	GUGAGCAAAGUCUCAGGUGUCA	DS239419	150148-150234	+	-32.5	intergenic	B,Cs
miR-9	UUUGGUUAUCUAGCUGUAUGA	DS239429	2204553-2204645	-	-29.4	intergenic	B,Cs
miR-92	UAUUGCACUCGUCCCGGCCUGA	DS239429	1144116-1144220	-	-31.8	intergenic	B,Cs
miR-9501	CAAGGCUUAUGGGUUAUUCUUAA	DS239411	4633636-4633774	-	-58.2	intergenic	Cs
miR-9517	UAAAUUAGCUAGGAGGAGCCUA	DS239431	824397-824489	+	-43.7	intergenic	Cs
miR-9518	AUUAUUUUUAUUGAUAAAGACU	DS239429	1447783-1447875	+	-42.7	intronic	Cs
miR-9532	UUAUUUUUGUAGAAGUUUUUU	DS239431	355278-355378	+	-28.3	intergenic	Cs
miR-9533	UAUCUUUAUGCUCUUAUCUUU	DS239412	654015-654121	+	-28.5	intronic	Cs
