# Supplementary material for: Diversity and Expression of MicroRNAs in the Filarial Parasite, Brugia malayi
Source: PLoS One. 2014 May 13;9(5):e96498. doi: 10.1371/journal.pone.0096498 (PMC4019659; doi:10.1371/journal.pone.0096498)
Supplement: Table S4 — Rare B. malayi miRNAs. This table lists the sequence, accession number, position, strand, hairpin stability and method(s) of identification/validation for rare B. malayi miRNAs: those represented by fewer than 100 reads in the raw data (Table S1). Prevalent miRNAs are listed in Table S3. When two miRNAs are generated from the same RNA hairpin, a star (*) after the name denotes the less abundant miRNA. (XLSX) [file pone.0096498.s005.xlsx]

## Sheet: Sheet1 (2)
miRNA	Sequence	Acc. no.b	Positionc	Strand	ΔG	Genomic contextd	Identificatione
miR-2f	UAUCACAAGCCCGAUACGACCAU	DS237081	557-662	-	-33.3	NA	Cs
miR-2g	AUAUCACAAACAAAAUUCUGG	DS239431	901907-902001	-	-36.3	intergenic	Cs
miR-2h-1	UAUCGCAGAUUCGAUUCGACAA	DS237141	10943-11060	-	-33.5	NA	Cs
miR-2h-2	UAUCGCAGAUUCGAUUCGACAA	DS238508	1178-1295	+	-33.5	intergenic	Cs
miR-2i	UAUCGCAGAAUCGAUGCAGCAU	DS238497	1267-1359	-	-40.2	intergenic	Cs
miR-5363*f	ACGGUUUGAAUGUUGUCCAACA	DS239431	1917036-1917129	-	-35.3	intergenic	Cs
miR-5844	UAACGACUUUAUUUGAUAGCAACC	DS239414	127212-127316	+	-28	intronic	Cs
miR-5852	UCUGCUGUUCUUAAUAUUCUGA	DS239071	28061-28170	+	-30.4	intronic	Cs
miR-5855	UAAUAUUUCGAGAUAGAAACCA	DS239393	632848-632948	-	-25.4	intronic	Cs
miR-5856b	ACUCCGUGUGUAGCAUUCGGUA	DS239400	2432783-2432883	-	-51	intergenic	Cs
miR-5858	UUCCUAAGCUAAAUCGAUUUUCU	DS239411	1865161-1865264	-	-33.4	intergenic	Cs
miR-5868	AAUUGAUUCUGCUAAUAUGCAGU	DS239411	5709456-5709549	+	-25.5	intergenic	Cs
miR-5871	UAUAGGAGGUCUCAAAAUGAAU	DS239429	82888-82980	-	-44.3	intergenic	Cs
miR-5876	UAGGAGGAAAUGAGGGGUAAG	DS239011	14775-14880	-	-33.42	intergenic	Cs
miR-5881b	AGGACAACUACGACACUAAGGG	DS239418	1405475-1405577	-	-52.2	intergenic	Cs
miR-9502	UGCUCUUUACAUAAGAAAGUGA	DS239985	3249-3356	-	-32.1	NA	Cs
miR-9503	UACUGGCUUUAAGUUCGGAUUUUU	DS239431	3457648-3457753	+	-30.3	intergenic	Cs
miR-9504	UAUCUCACAUUCAUCCGUAUUU	DS238826	31891-32000	-	-47.8	intronic	Cs
miR-9505	UGAUGUCUGUCAAAAUCAUAU	DS239431	3731919-3732051	+	-34.1	intergenic	Cs
miR-9505*f	UAUGGUUGUGACAAACAUCACG	DS239431	3731919-3732051	+	-34.1	intergenic	Cs
miR-9506	UGCGCUAGUUCAGGAGGAGC	DS239420	76754-76841	-	-35	exonic	Cs
miR-9507	UAGAAGUGUACUCCACAUCAAA	DS239375	22033-22124	+	-35.7	intergenic	Cs
miR-9508	CCCUGUCUACUGAUUGGAUUGCU	DS239400	532686-532789	-	-32.1	intergenic	Cs
miR-9509	UAUGUAGUUCGGCUUUGCAAUUG	DS239394	24944-25050	+	-36.5	intronic	Cs
miR-9510	UUUCCCAUCUUUUUCUCUUCAG	DS236980	9640-9531	-	-34.3	intergenic	Cs
miR-9511	UAACCGGAUAGUCCUGAUGAU	DS236929	7754-7861	+	-36	intergenic	Cs
miR-9512	AGUGAUACCAAACAGACCUUU	DS239414	76172-76266	+	-33.1	intergenic	Cs
miR-9513	UGGUAAGUCGAGCUCGACCGAUUU	DS239868	4829-4938	+	-44.7	intragenic	Cs
miR-9514	UAAAAAGAAGGCAUUGAAUAUC	DS239400	739548-739655	+	-47.2	intronic	Cs
miR-9515	UGCACCAUUAUGCUGUAUGAAAU	DS239429	1840634-1840743	-	-40.6	intronic	Cs
miR-9516	CACUGUCUACUAGAUGCAUAC	DS239416	471065-471166	-	-39.3	intronic	Cs
miR-9517*f	AGCUCCUCCUAGCUAAUUUGCA	DS239431	824397-824489	+	-43.7	intergenic	Cs
miR-9519	UUUCCGUAGAACAUUAAACGAAU	DS239411	5256848-5256954	-	-43.7	intragenic	Cs
miR-9520	AGAGGAUUCAUUCAAAUAUUA	DS239090	38054-38153	+	-34.3	intergenic	Cs
miR-9521	UCAAAACAAGUACCUGCCCAUU	DS239411	6330961-6331070	-	-36.8	intergenic	Cs
miR-9522	GAAAUUGUUUUGUAACUUGAU	DS239411	3169732-3169841	-	-59.1	intergenic	Cs
miR-9523	UGAACUGGUUUGCUAAAUUUCU	DS238763	33499-33592	+	-36.4	intergenic	Cs
miR-9524	UGAACUGGUUUGCUAAAUUUCU	DS239431	795605-795714	+	-43	intergenic	Cs
miR-9525	CUGCUGUGCUGGGAUACGACUAU	DS238728	61981-62090	-	-36.6	intergenic	Cs
miR-9526	UUGGUUUGUGAGUUUGUUUUUA	DS239036	33211-33320	-	-36	intergenic	Cs
miR-9527	UGACUUCACCAAAUUUUUACA	DS237858	18790-18892	+	-39.1	intergenic	Cs
miR-9528	AGGAAUGAAAAAUCUGCGGAUU	DS239429	726201-726310	-	-41.8	intergenic	Cs
miR-9529	UCUGGAAGCUGAGUACGUAUCU	DS239429	420223-420326	+	-43.8	intergenic	Cs
miR-9530	UUGUAAUAGAUGGAAAAGGACC	DS239166	193-302	+	-37.7	intergenic	Cs
miR-9531	AGUGAUAAUGAUGAGAAGAAG	DS239497	8799-8896	+	-34.8	intergenic	Cs
miR-9534	AUGUUAUUUUUUGGAGAAGUCGU	DS238669	7900-8020	+	-30.2	intergenic	Cs
miR-9535	UUUGCCCUAACAAACAAUAAU	DS239034	11234-11336	+	-24.9	NA	Cs
miR-9536	CAUUCCAGGAAAGGCAUUAAUAU	DS237267	5954-6060	+	-34.7	intronic	Cs
miR-9537	UUUUCCUGUCUUCAUUUCCCUU	DS239429	285662-285768	-	-42.8	intergenic	Cs
