# Supplementary material for: Diversity and Expression of MicroRNAs in the Filarial Parasite, Brugia malayi
Source: PLoS One. 2014 May 13;9(5):e96498. doi: 10.1371/journal.pone.0096498 (PMC4019659; doi:10.1371/journal.pone.0096498)
Supplement: Table S8 — B. pahangi miRNA paralogues. For each miRNA family, the table lists B. pahangi miRNAs that are related by either a 5′ 7 nt match at positions 1–7 or 2–8, a 5′ 6 nt at positions 1–6 or 2–7 or by overall identity of ≥70% with no 5′ match. In addition, miRNAs with a 5′ nt match that also exhibit overall identity of 60–69% are denoted by a ∧ symbol. (XLSX) [file pone.0096498.s009.xlsx]

## Sheet: Sheet3 (2)
			B. pahangi paralogues
	miRNA family1	family members1	5' 7 nt match2	5' 6 nt match3	no 5' match but > 70%identity4
	bantam	bantam		miR-1175
		miR-1175		bantam
	let-7	let-7	miR-84-5p	miR-5364^
		miR-84-5p	let-7	miR-5364^
		miR-5364		let-7^
				miR-84-5p^
	miR-2	miR-2a	miR-2c
			miR-2d
			miR-250
			miR-5870
		miR-2b	miR-2c
		miR-2c	miR-2a
			miR-2b
			miR-2d
			miR-250
			miR-5870
		miR-2d	miR-2a
			miR-2c
			miR-250
			miR-5870
		miR-250	miR-2a
			miR-2c
			miR-2d
			miR-5870
		miR-5870	miR-2a
			miR-2c
			miR-2d
			miR-250
	miR-36*	miR-36a/b		miR-5361^
		miR-5361		miR-36a/b^
	miR-45	miR-45	mir-279
		mir-279	miR-45
	miR-87	miR-87a	miR-87b
			miR-5843
		miR-87b	miR-87a
			miR-5843
		miR-5843	miR-87a
			miR-87b
	miR-92	miR-92		miR-137
		miR-137		miR-92
	miR-100	miR-100a	miR-100b
			miR-100c
			miR-100d
		miR-100b	miR-100a
			miR-100c
			miR-100d
		miR-100c	miR-100a
			miR-100b
			miR-100d
		miR-100d	miR-100a
			miR-100b
			miR-100c
	miR-268	miR-268		miR-5881c
		miR-5881c		miR-268
	miR-283	miR-283	miR-5861
		miR-5861	miR-283	miR-5855
		miR-5855		miR-5861
	miR-5882	miR-5882a			miR-5882b
		miR-5882b			miR-5882a
	miR-5363	miR-5363	miR-5882b
		miR-5882b	miR-5363		miR-5882a
		miR-5882a			miR-5882b
	miR-5880	miR-5880a			miR-5880b
		miR-5880b			miR-5880a
	miR-5365b	miR-5365b		miR-5867^
		miR-5867		miR-5365b^
